# Supplementary material
Source: Springer Nature journal article supplement (https://www.springermedizin.de/resource/supplementary/12885_2010_3072_MOESM1_ESM.pdf/9462130)

**A**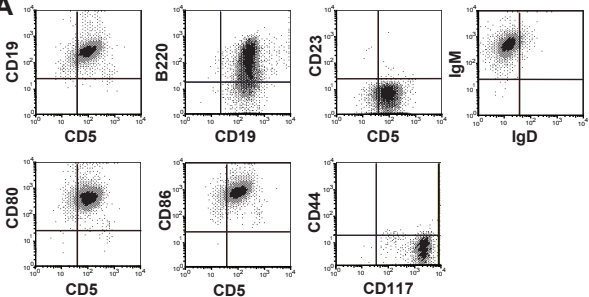**B**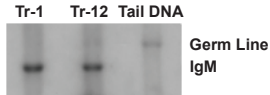

Supplement: MOESM1 [file 9462130]
